# Supplementary material for: Enriched graphitic N in nitrogen-doped graphene as a superior metal-free electrocatalyst for the oxygen reduction reaction
Source: Royal Society of Chemistry journal article supplement (doi:10.1039/c8nj04857f), 2018-01-01
Supplement: c8nj04857f1.pdf [file c8nj04857f1.pdf]

## Supporting Information

# Enriched Graphitic N in Nitrogen-doped Graphene as A Superior Metal-free Electrocatalyst for Oxygen Reduction Reaction

*Xiangyu Lu,<sup>a</sup> Dan Wang,<sup>a</sup> Liping Ge,<sup>a</sup> Lihui Xiao,<sup>a</sup> Haiyan Zhang,<sup>\*b</sup> Lilai Liu,<sup>c</sup> Jinqiu Zhang,<sup>a</sup> Jinqiu Zhang,<sup>a</sup> Maozhong An<sup>a</sup> and Peixia Yang<sup>\*a</sup>*

a MIIT Key Laboratory of Critical Materials Technology for New Energy Conversion and Storage, School of Chemistry and Chemical Engineering, Harbin Institute of Technology, Harbin, 150001 China.

b College of Life Science, Henan University, Kaifeng, 475004 China

c College of Environmental and Chemical Engineering, Heilongjiang University of Science and Technology, Harbin, 150022 China.

<sup>a\*</sup>E-mail: yangpeixia@hit.edu.cn

<sup>b\*</sup>E-mail: zhanghy150@sina.com

Table S1 The content of N, C and O for N-G-800, N-G-900 and N-G-1000 (at%)

| Samples  | C     | N    | O    |
|----------|-------|------|------|
| N-G-800  | 88.34 | 6.65 | 5.01 |
| N-G-900  | 89.58 | 4.68 | 5.57 |
| N-G-1000 | 89.1  | 3.46 | 7.44 |

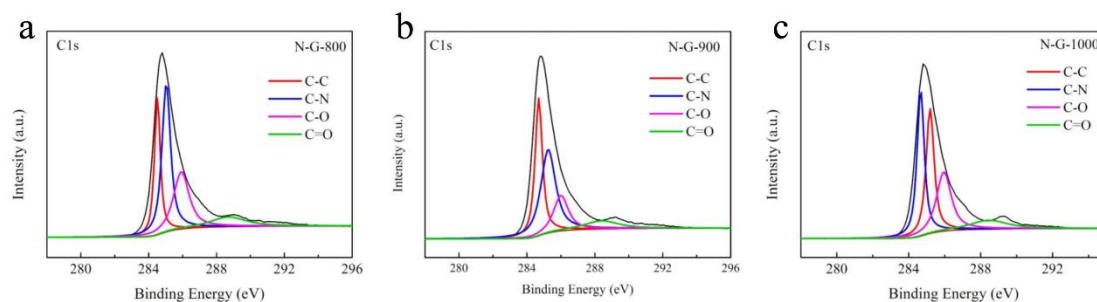

**Fig. S1** High-resolution C1s spectra of (a) N-G-800, (b) N-G-900 and (c) N-G-1000.

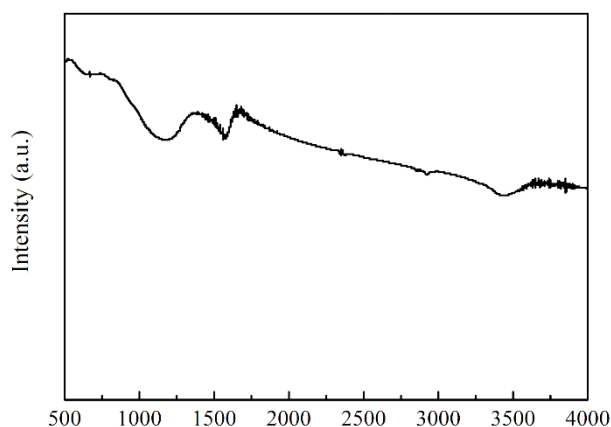

**Fig. S2** FT-IR spectra of N-G-1000

Table S2. Summary of N contents N-G-800, N-G-900 and N-G-1000.

| Samples  | Species     | contents (%) | contents (at%) |
|----------|-------------|--------------|----------------|
| N-G-800  | pyridinic N | 36.98        | 2.46           |
|          | pyrrolic N  | 30.27        | 2.01           |
|          | graphitic N | 16.93        | 1.13           |
|          | oxidized N  | 15.82        | 1.05           |
| N-G-900  | pyridinic N | 29.97        | 1.40           |
|          | pyrrolic N  | 19.72        | 0.92           |
|          | graphitic N | 30.15        | 1.41           |
|          | oxidized N  | 20.16        | 0.94           |
| N-G-1000 | pyridinic N | 29.25        | 1.01           |
|          | pyrrolic N  | 15.29        | 0.53           |
|          | graphitic N | 41.54        | 1.44           |
|          | oxidized N  | 13.92        | 0.48           |

Table S3. The electrochemical parameters of the samples

| Samples  | $E_{\text{onset}} / \text{V (vs.RHE)}$ | $E_{1/2} / \text{V (vs.RHE)}$ | $j@0.3 \text{ V} / \text{mA cm}^{-2}$ |
|----------|----------------------------------------|-------------------------------|---------------------------------------|
| N-G-800  | 0.929                                  | 0.820                         | 5.23                                  |
| N-G-900  | 0.979                                  | 0.845                         | 5.54                                  |
| N-G-1000 | 0.982                                  | 0.862                         | 5.48                                  |
| 20% Pt/C | 0.968                                  | 0.833                         | 5.30                                  |

Table S4. ORR activity comparison between this work and catalysts in the literature.

| Materials              | $E_{1/2} \text{ (V) in 0.1 M KOH}$ | References |
|------------------------|------------------------------------|------------|
| This work              | 0.862 (vs. RHE)                    | This work  |
| NDGs-800               | 0.85 (vs. RHE)                     | 1          |
| NGS4-900               | 0.859 (vs. RHE)                    | 2          |
| NGA                    | -0.17 (vs. Ag/AgCl)                | 3          |
| N/3D-GNS-850           | 0.80 (vs. RHE)                     | 4          |
| NMGF                   | 0.714 (vs. RHE)                    | 5          |
| NGC900                 | 0.84 (vs. RHE)                     | 6          |
| NGM                    | 0.77 (vs. RHE)                     | 7          |
| G-CN/C-2               | 0.79 (vs. RHE)                     | 8          |
| NGCNPs-T600            | -0.131 (vs. SCE)                   | 9          |
| NHCS-1000              | -0.215 (vs. SCE)                   | 10         |
| CN <sub>x</sub> /CMK-3 | 0.83 (vs. RHE)                     | 11         |
| NMNC-1000              | 0.759 (vs. RHE)                    | 12         |
| FeN <sub>x</sub> -PNC  | 0.85 (vs.RHE)                      | 13         |
| C-FeZIF-900-0.84       | 0.86 (vs.RHE)                      | 14         |
| NiO/CoN PINWs          | 0.68 (vs.RHE)                      | 15         |
| cal-CoZIF-VXC72        | 0.84 (vs.RHE)                      | 16         |

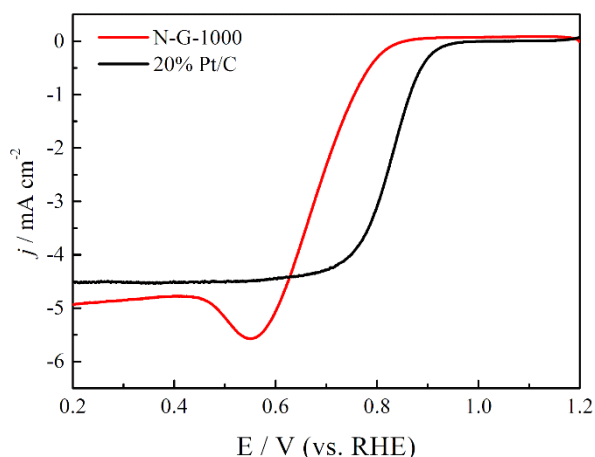

**Fig. S3** N-G-1000 and commercial 20 wt % Pt/C in O<sub>2</sub>-saturated 0.1 M HClO<sub>4</sub> at a scan rate of 10 mV s<sup>-1</sup> and electrode-rotation speed of 1600 rpm

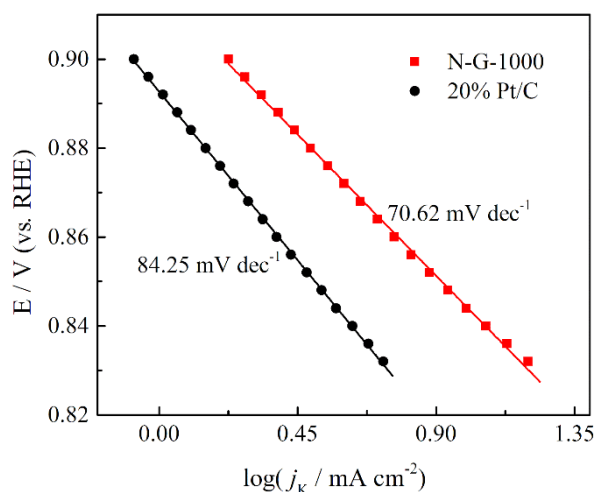

**Fig. S4** Tafel plots with 1600 rpm RDE of N-G-1000 and Pt/C.

Table S5. Active centers of the N-doped graphene catalysts for ORR between this work and the recent reports in the literature.

| Names of nitrogen doped graphene                 | Active centers                                                                                     |
|--------------------------------------------------|----------------------------------------------------------------------------------------------------|
| N-G-1000 (this work)                             | Carbon atoms neighboring Graphitic N.                                                              |
| N-doped zigzag graphene ribbons <sup>17</sup>    | Graphitic N next to the edge.                                                                      |
| Polyaniline/RG-O, polypyrrole/RG-O <sup>18</sup> | Graphitic N determines the limiting current density, and pyridinic N improves the onset potential. |
| Nitrogen doped graphene <sup>19</sup>            | Graphitic N configuration.                                                                         |
| Mesoporous nitrogen-doped graphene <sup>20</sup> | Pyrolic nitrogen along with the mesoporous structure of graphene.                                  |
| Nitrogen-doped graphene <sup>21</sup>            | Pyridinic N.                                                                                       |
| Highly oriented pyrolic graphite <sup>22</sup>   | Carbon atoms next to pyridinic N.                                                                  |

## References

- 1 Q. Wang, Y. Ji, Y. Lei, Y. Wang, Y. Wang, Y. Li, S. Wang, *ACS Energy Letters*, 2018, **3**, 1183-1191.
- 2 Q. Xiang, Y. Liu, X. Zou, B. Hu, Y. Qiang, D. Yu, W. Yin, C. Chen, *ACS Appl. Mater. Interfaces*, 2018, **10**, 10842-10850.
- 3 L. Zhao, X. Sui, J. Li, J. Zhang, L. Zhang, G. Huang, Z. Wang, *Applied Catalysis B: Environmental*, 2018, **231**, 224-233.
- 4 S. Kabir, K. Artyushkova, A. Serov, P. Atanassov, *ACS Appl. Mater. Interfaces*, 2018, **10**, 11623-11632.
- 5 H. Wang, C. Tang, Q. Zhang, *Catalysis Today*, 2018, **301**, 25-31.
- 6 R. Luo, C. Liu, J. Li, C. Wang, X. Sun, J. Shen, W. Han, L. Wang, *ACS Appl. Mater. Interfaces*, 2017, **9**, 32737-32744.
- 7 C. Tang, H. Wang, X. Chen, B. Li, T. Hou, B. Zhang, Q. Zhang, M. Titirici, F. Wei, *Adv. Mater.*, 2016, **28**, 6845-6851.
- 8 X. Fu, X. Hu, Z. Yan, K. Lei, F. Li, F. Cheng, J. Chen, *Chem. Commun.*, 2016, **52**, 1725-1728.
- 9 R. Ma, Y. Zhou, P. Li, Y. Chen, J. Wang, Q. Liu, *Electrochimica Acta*, 2016, **216**, 347-354.
- 10 T. Zhou, Y. Zhou, R. Ma, Z. Zhou, G. Liu, Q. Liu, Y. Zhu, J. Wang, *Carbon*, 2017, **114**, 177-186.
- 11 C. Xiao, X. Chen, Z. Fan, J. Liang, B. Zhang, S. Ding, *Nanotechnology*, 2016, **27**, 445402.
- 12 C. Guo, X. Tong, X. Guo, *Int. J. Hydrogen Energy*. 2016, **41**, 22941-22951.
- 13 L. Ma, S. Chen, Z. Pei, Y. Huang, G. Liang, F. Mo, Q. Yang, J. Su, Y. Gao, J.A. Zapien, C. Zhi, *ACS Nano*, 2018, **12**, 1949-1958.
- 14 Y. Deng, Y. Dong, G. Wang, K. Sun, X. Shi, L. Zheng, X. Li, S. Liao, *ACS Appl. Mater. Interfaces*, 2017, **9**, 9699-9709.
- 15 J. Yin, Y. Li, F. Lv, Q. Fan, Y. Zhao, Q. Zhang, W. Wang, F. Cheng, P. Xi, S. Guo, *ACS Nano*, 2017, **11**, 2275-2283.
- 16 B. Ni, C. Ouyang, X.B. Xu, J. Zhuang, X. Wang, *Adv. Mater.*, 2017, **29**, 1701354-1701360.
- 17 Wang X.; Hou Z.; Ikeda T.; Huang SF.; Terakura K.; Boero M., *Phys. Rev. B* **2011**, **84**, 245434. 1-7.
- 18 L. Lai, J.R. Potts, D. Zhan, L. Wang, C.K. Poh, C. Tang, H. Gong, Z. Shen, J. Lin, R.S. Ruoff, *Energy Environ. Sci.*, 2012, **5**, 7936-42.
- 19 Y. Liu, J. Li, W. Li, Y. Li, F. Zhan, H. Tang, Q. Chen, *Int. J. Hydrogen Energy*, 2016, **41**, 10354-10365.
- 20 S.M. Unni, S. Devulapally, N. Karjule, S. Kurungot, *J. Mater. Chem.*, 2012, **22**, 23506-13.

- 21 J. Wu, L. Ma, R.M. Yadav, Y. Yang, X. Zhang, R. Vajtai, J. Lou, P.M. Ajayan, *ACS Appl. Mater. Interfaces*, 2015, **7**, 14763-9.
- 22 D. Guo, R. Shibuya, C. Akiba, S. Saji, T. Kondo, J. Nakamura, *Science*, 2016, **351**, 361-5.
